# Supplementary material for: Variation in GDP and its Link with Ecological Footprint and Air Pollution- A Across Country Analysis
Source: Research Square preprint supplement (doi:10.21203/rs.3.rs-3073912/v1), 2023-07-06
Supplement: Supplementary file 1 [file 63b532cf6f4e19a268bc32e9.docx]

**Appendix:**

Table 1A: List of countries

| Sl no. | **Higher**  **Income** | **Middle**  **Income** | **Lower**  **Income** |
| --- | --- | --- | --- |
| 1 | Japan | Indonesia | Nepal |
| 2 | Canada | Bangladesh | Tajikistan |
| 3 | USA | India | Benin |
| 4 | Poland | Thailand | Eritrea |
| 5 | Finland | Kyrgyzstan | Tanzania |
| 6 | Sweden | Turkey | Mozambique |
| 7 | Ireland | Malaysia | Ethiopia |
| 8 | Panama | China | Niger |
| 9 | Argentina | Zambia | Senegal |
| 10 | Italy | Botswana | Haiti |
| 11 | Germany | Nigeria | - |
| 12 | Spain | Cameroon | - |
| 13 | France | Kenya | - |
| 14 | Oman | Morocco | - |
| 15 | Israel | Gabon | - |
| 16 | South Korea | Brazil | - |
| 17 | Slovakia | Colombia | - |
| 18 | Norway | Bolivia | - |
| 19 | Slovenia | Paraguay | - |
| 20 | Netherland | Ecuador | - |
| 21 | - | Mexico | - |
| 22 | - | Honduras | - |
| 23 | - | Albania | - |
| 24 | - | Romania | - |
| 25 | - | Russia | - |
| 26 | - | Bulgaria | - |

Table 1B: Data definition and sources

|  |  |  |
| --- | --- | --- |
| Variable | Definition | Source |
| EFI | Ecological Footprint (Global Hectares) | Global Ecological Footprint |
| CO2 | CO2 emissions (metric tons per capita) | World Bank Development Indicator |
| N2O | Nitrous oxide emissions (thousand metric tons of CO2 equivalent) | World Bank Development Indicator |
| SO2 | Total SO2 emission in Gg | Emission Database for Global Atmospheric Research |
| CH4 | Methane emissions (kt of CO2 equivalent) | World Bank Development Indicator |
| GDPPC | GDP per capita (current US$) | World Bank Development Indicator |
| FDI | Foreign direct investment, net inflows (% of GDP) | World Bank Development Indicator |
| UP | Urban population growth (annual %) | World Bank Development Indicator |
| FFEC | Fossil fuel energy consumption (% of total energy consumption) | World Bank Development Indicator |

Table 1C: Descriptive Statistics

| **Variables** | **EF** | **CO2** | **N2O** | **SO2** | **CH4** | **GDPPC** | **FDI** | **UP** | **FFEC** |
| --- | --- | --- | --- | --- | --- | --- | --- | --- | --- |
| **Higher Income Countries** | | | | | | | | | |
| **Mean** | 2.887908 | 8.888261 | 34636.23 | 1146.046 | 62267.51 | 26813.1 | 3.790818 | 1.198453 | 77.44612 |
| **Std. Dev.** | 1.13489 | 3.895519 | 68536.84 | 2939.127 | 118547.9 | 17606.7 | 7.443744 | 1.285579 | 17.36873 |
| **Max** | 5.838554 | 20.17875 | 366029.4 | 21342.46 | 637636 | 103059.2 | 87.44259 | 9.116863 | 100 |
| **Min** | .032195 | 1.089525 | 388.1944 | 17.19556 | 1910.18 | 1731.21 | -5.670921 | -1.601972 | 25.1171 |
| **Skewness** | -.231418 | .836739 | 3.69804 | 4.615774 | 3.686496 | 1.072663 | 6.429347 | 2.745918 | -.919426 |
| **Kurtosis** | 3.779533 | 3.824565 | 16.01665 | 25.11879 | 15.99588 | 4.981532 | 60.11283 | 14.46759 | 3.073471 |
| **Middle Income Group** | | | | | | | | | |
| **Mean** | 1.227079 | 2.643317 | 52782.48 | 1770.11 | 146264.3 | 3141.038 | 2.744614 | 2.618476 | 62.26088 |
| **Std. Dev.** | .6466585 | 2.623188 | 101383.3 | 4979.362 | 289129.7 | 2997.248 | 2.971158 | 1.588701 | 26.03397 |
| **Max** | 4.170104 | 15.83642 | 642471.2 | 32647.93 | 1917337 | 16007.09 | 31.24253 | 11.49811 | 96.94483 |
| **Min** | .2331838 | .0909355 | 254.9118 | .6730943 | 2268.97 | 200.8522 | -8.589432 | -1.966977 | 6.736325 |
| **Skewness** | .9452294 | 1.911592 | 3.164145 | 4.281432 | 3.273525 | 1.480235 | 2.570387 | -.06441 | -.689025 |
| **Kurtosis** | 4.033603 | 7.297673 | 13.89574 | 21.42849 | 15.28627 | 4.765668 | 20.73885 | 4.705705 | 2.177537 |
| **Lower Income Group** | | | | | | | | | |
| **Mean** | .5327655 | .2398862 | 7284.152 | 19.82291 | 14223.4 | 473.4653 | 2.820138 | 3.952925 | 24.75684 |
| **Std. Dev.** | .270123 | .2349345 | 9470.814 | 14.89635 | 15288.47 | 300.7509 | 5.324376 | 1.462947 | 16.9816 |
| **Max** | 3.513004 | 2.137128 | 41025.69 | 63.69232 | 66377.54 | 1411.929 | -9.716081 | -.4225157 | 71.32122 |
| **Min** | .1429073 | .0335559 | 865.1852 | .716701 | 1926.18 | 111.9272 | 41.80964 | 7.856553 | 2.244968 |
| **Skewness** | 5.278606 | 3.730075 | 2.015701 | 1.138423 | 1.758076 | 1.161854 | 4.195352 | -.3939115 | .5644137 |
| **Kurtosis** | 58.24054 | 25.53842 | 6.272595 | 3.408041 | 5.441187 | 3.825163 | 26.11172 | 4.274095 | 2.430238 |
